# Supplementary material
Source: Research Square preprint supplement (doi:10.21203/rs.3.rs-9914100/v1)
Supplement: Supplementary file 1 [file c6be635a29cdf8883d069a8e.docx]

**Supplementary methods**

**Flow Cytometry Analysis (Cell Cycle, Annexin V, Cleaved Caspase-3/-8/-9, Cleaved PARP-1, Fas/FasL, Mitochondrial Membrane Potential ΔΨm, PD-L1)**

Flow cytometry was used to evaluate cell cycle distribution, apoptosis markers (Annexin V, cleaved caspase-3, -8, -9, cleaved PARP-1, Fas, FasL), mitochondrial membrane potential (ΔΨm), and PD-L1 expression in SAS and MOC1 cells following palbociclib treatment. Cells were seeded in 6-well plates at 3 × 10⁵ cells/well and incubated overnight at 37 °C. The next day, cells were treated with palbociclib (0–12 μM) for 48 h. After treatment, cells were harvested and counted (1 × 10⁶ cells per sample), followed by staining with appropriate detection reagents: propidium iodide (PI) for cell cycle analysis; Annexin V-FITC for apoptosis; fluorochrome-conjugated inhibitors for cleaved caspase-3, -8, -9, and cleaved PARP-1; specific antibodies for Fas and FasL; JC-1 or equivalent dye for ΔΨm assessment; and anti-PD-L1 (CD274-FITC) antibody for PD-L1 detection. Staining was performed for 30 min at room temperature in the dark. Samples were analyzed using NovoExpress® flow cytometer (Agilent, Santa Clara, CA, USA), and data were analyzed with FlowJo software (BD Pharmingen™). The antibodies used in this work were listed in Supplementary Table II.

**RNA Extraction and Reverse Transcription Polymerase Chain Reaction (RT-PCR)**

SAS and MOC1 cells were seeded into 6-cm culture dishes at a density of 5 × 10⁵ cells per dish and incubated overnight at 37 °C. Cells were then treated with various concentrations of palbociclib and incubated for an additional 48 hours. After treatment, the culture medium was removed, and the cells were washed twice with ice-cold PBS. Total RNA was extracted using the GENEzol™ TriRNA Pure Kit (Geneaid Biotech) according to the manufacturer’s protocol. Gene expression levels of PD-L1 were analyzed using TaqMan™ Gene Expression Assays. Human and mouse CDK4, CDK6, and PD-L1 assay kits were purchased from Thermo Fisher Scientific (Cat. No. 4331182). Complementary DNA (cDNA) was synthesized from the isolated RNA, followed by preparation of the PCR reaction mixture. The RT-PCR reactions were performed and analyzed according to the manufacturer’s recommendations 1.

**Enzyme-Linked Immunosorbent Assay (ELISA)**

The expression levels of C-X-C motif chemokine 12 (CXCL12), and CXCR4 after palbociclib or added with SDF-1 (25 ng/ml) treatment were quantified using commercial ELISA kits. SAS and MOC1 cells were seeded into 6-well culture plates at a density of 3 × 10⁵ cells per well and incubated overnight at 37 °C. Cells were then treated with various concentrations of palbociclib and incubated for an additional 48 hours at 37 °C. Following treatment, the culture supernatants were collected and subjected to ELISA analysis according to the manufacturer's instructions. The optical density (OD) values were measured using an ELISA plate reader 2.

**Immunohistochemistry (IHC) staining**

Resected tumor tissues were fixed in 4% paraformaldehyde (PFA) at 4°C. Paraffin-embedded specimens were sectioned at a thickness of 5 μm by Bio-Check Laboratories Ltd (New Taipei City, Taiwan). For protein expression analysis, immunohistochemical (IHC) staining was performed according to the manufacturer’s protocols 3. Specifically, tissue sections were incubated with a panel of primary antibodies as detailed in Supplementary Table III.

**Immunofluorescence (IF)**

Cells were seeded onto chamber slides at a density of 1 × 10⁴ cells per well and incubated overnight at 37 °C. Chamber slides were purchased from Merck Millipore (Merck, Burlington, MA, USA). The following day, cells were treated with various concentrations of palbociclib for 48 hours. After treatment, the medium was removed, and cells were fixed with 4% paraformaldehyde (200 μL/well) for 15 minutes at room temperature. Following fixation, slides were washed with PBS and permeabilized with 0.01% Triton X-100 in PBS (200 μL/well). The slides were then washed on a shaker at 70–80 rpm for 3 minutes at room temperature. Cells were blocked with 1% BSA in PBS for 1 hour (200 μL/well). Additionally, Tumor tissues were embedded in Optimal Cutting Temperature (OCT) compound and cut into 5-μm thick cryosections. The resulting slides were fixed with 4% paraformaldehyde and subsequently blocked using a 3% bovine serum albumin (BSA) solution to minimize non-specific binding. Primary antibody incubation was performed overnight at 4 °C. After incubation, the primary antibody was removed, and slides were washed in PBST on a shaker (70–80 rpm, 3 minutes), followed by two additional washes with PBS. Cells or tissue section were then incubated with the appropriate secondary antibody (diluted 1:300 in 1% BSA/PBS) and subjected to the same washing steps described above 4. Finally, slides were mounted with DAPI-mounting medium and imaged using a fluorescence microscope


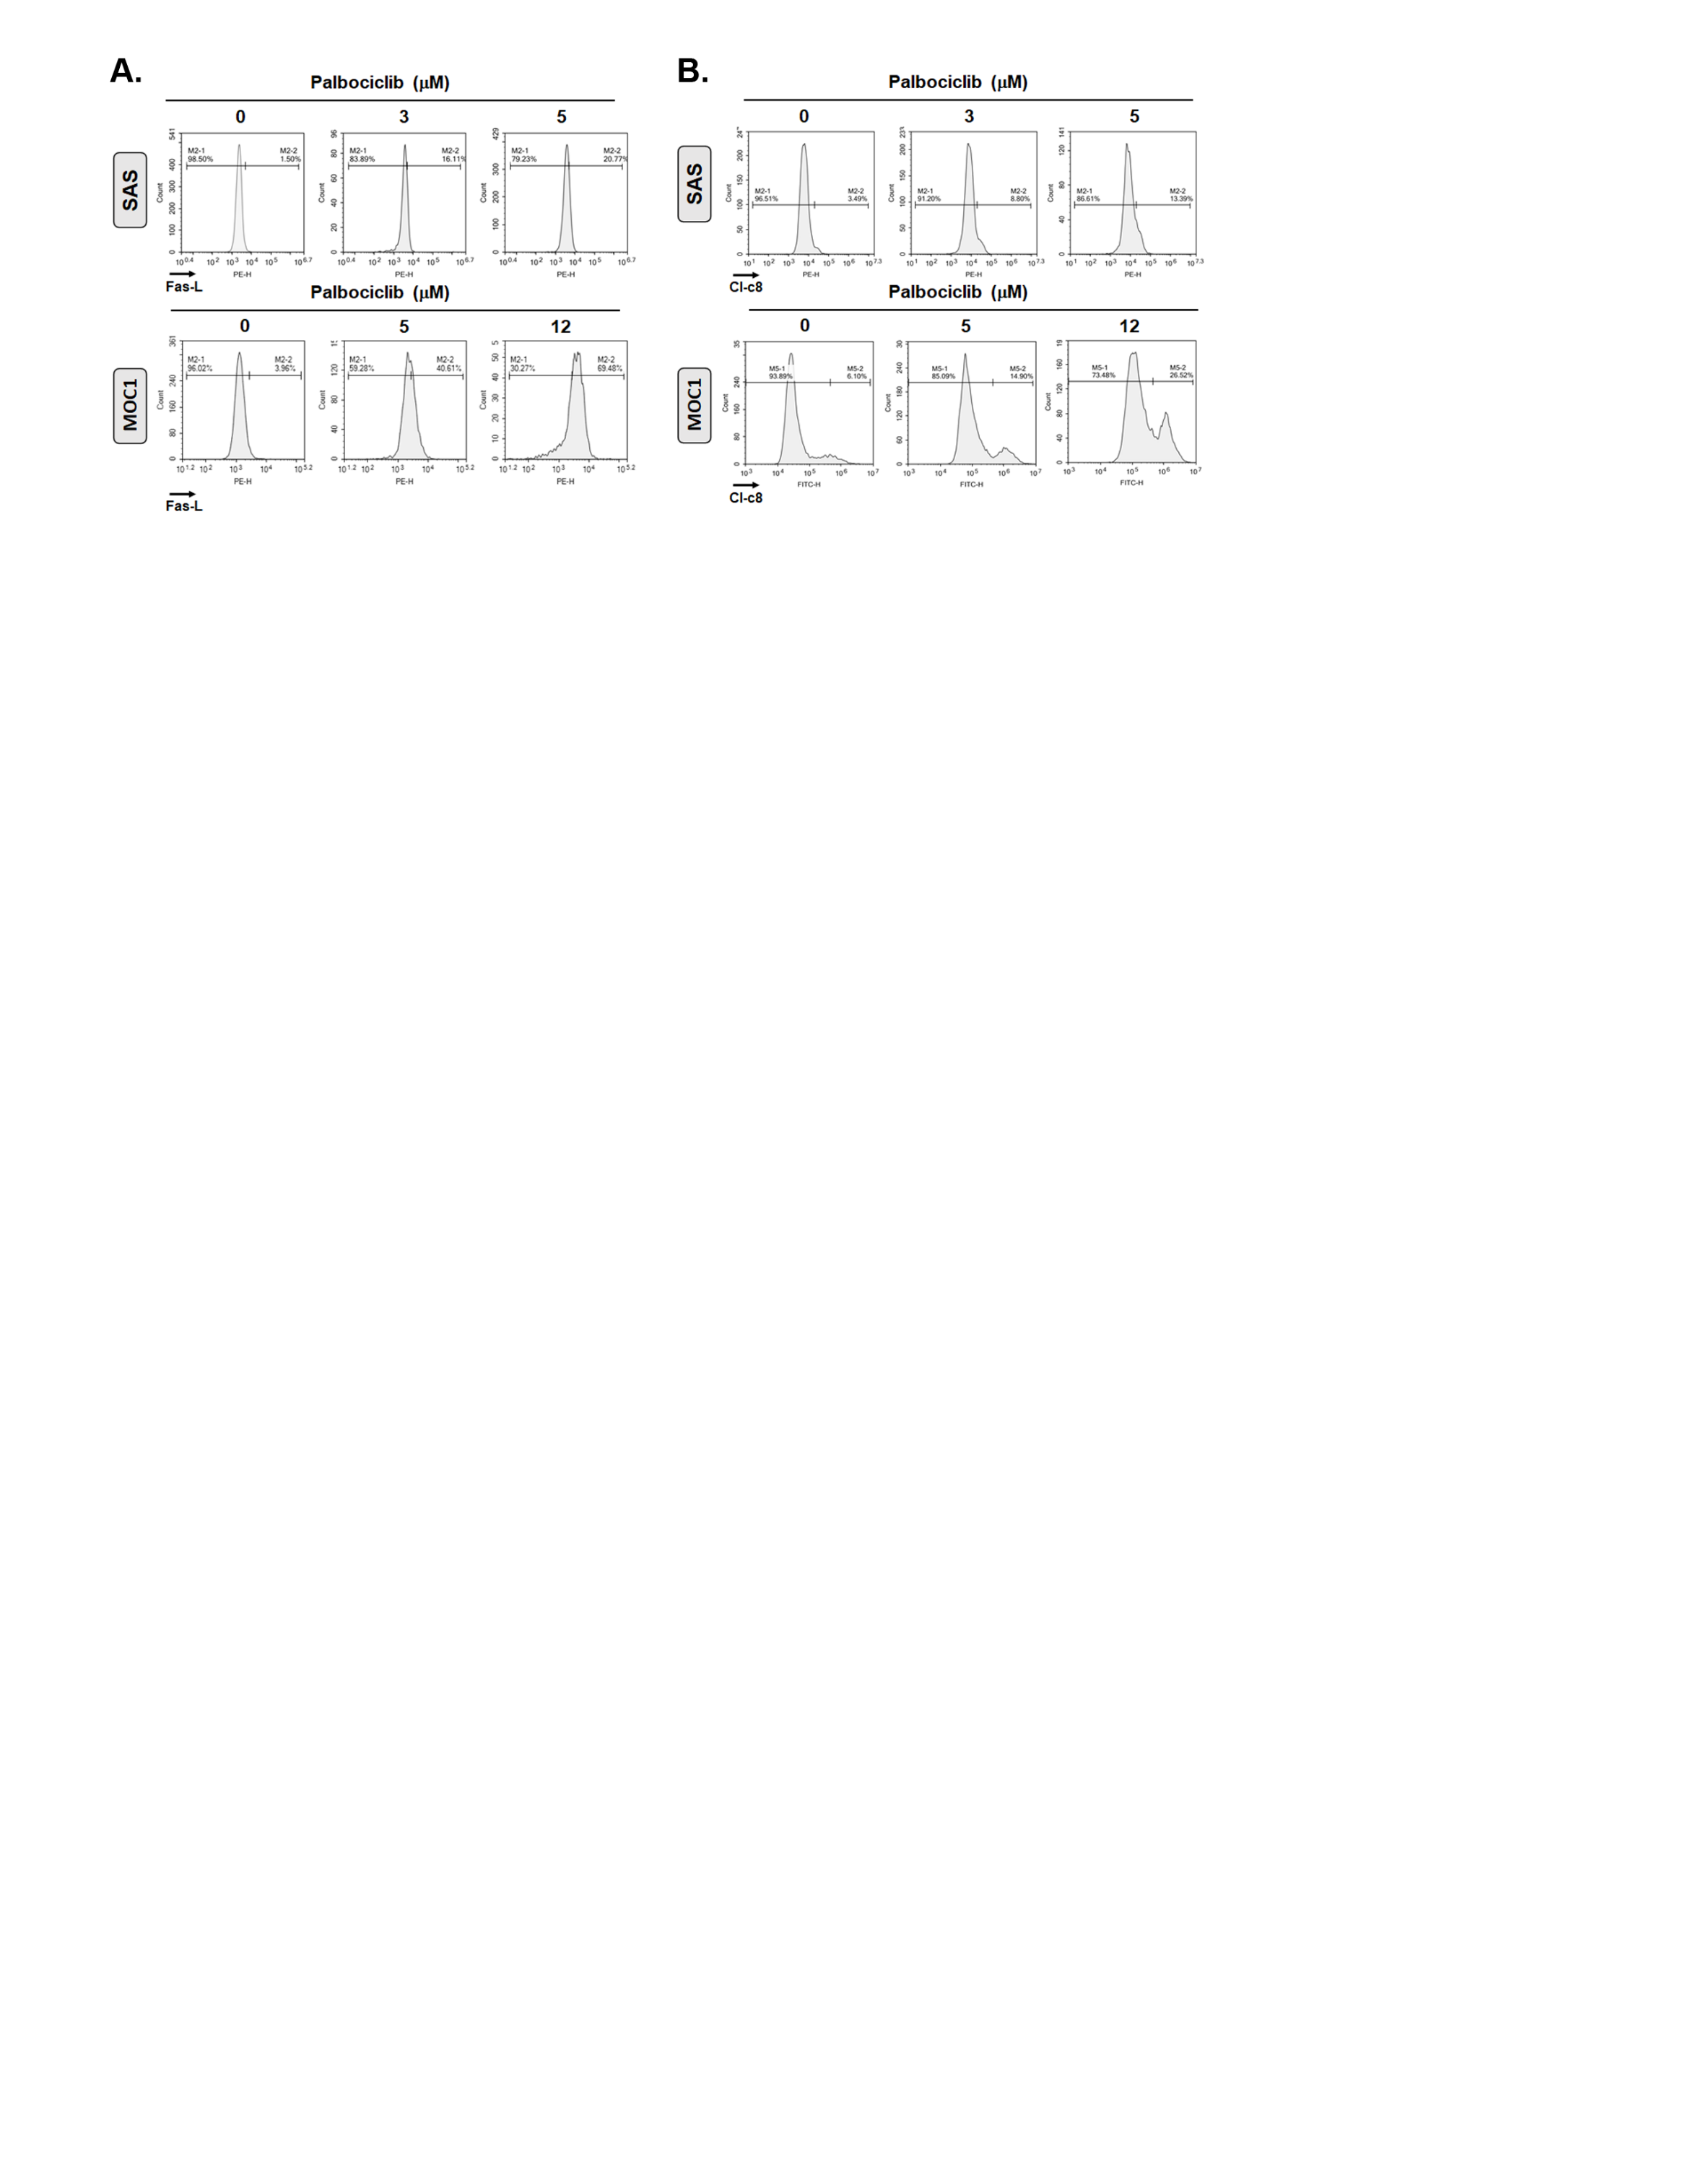


**Supplementary Figure 1. Fas-L and cleaved caspase-3 activation pattern validated by flow cytometry.** Their quantification data is displayed in main text Figure 1F and G.

**
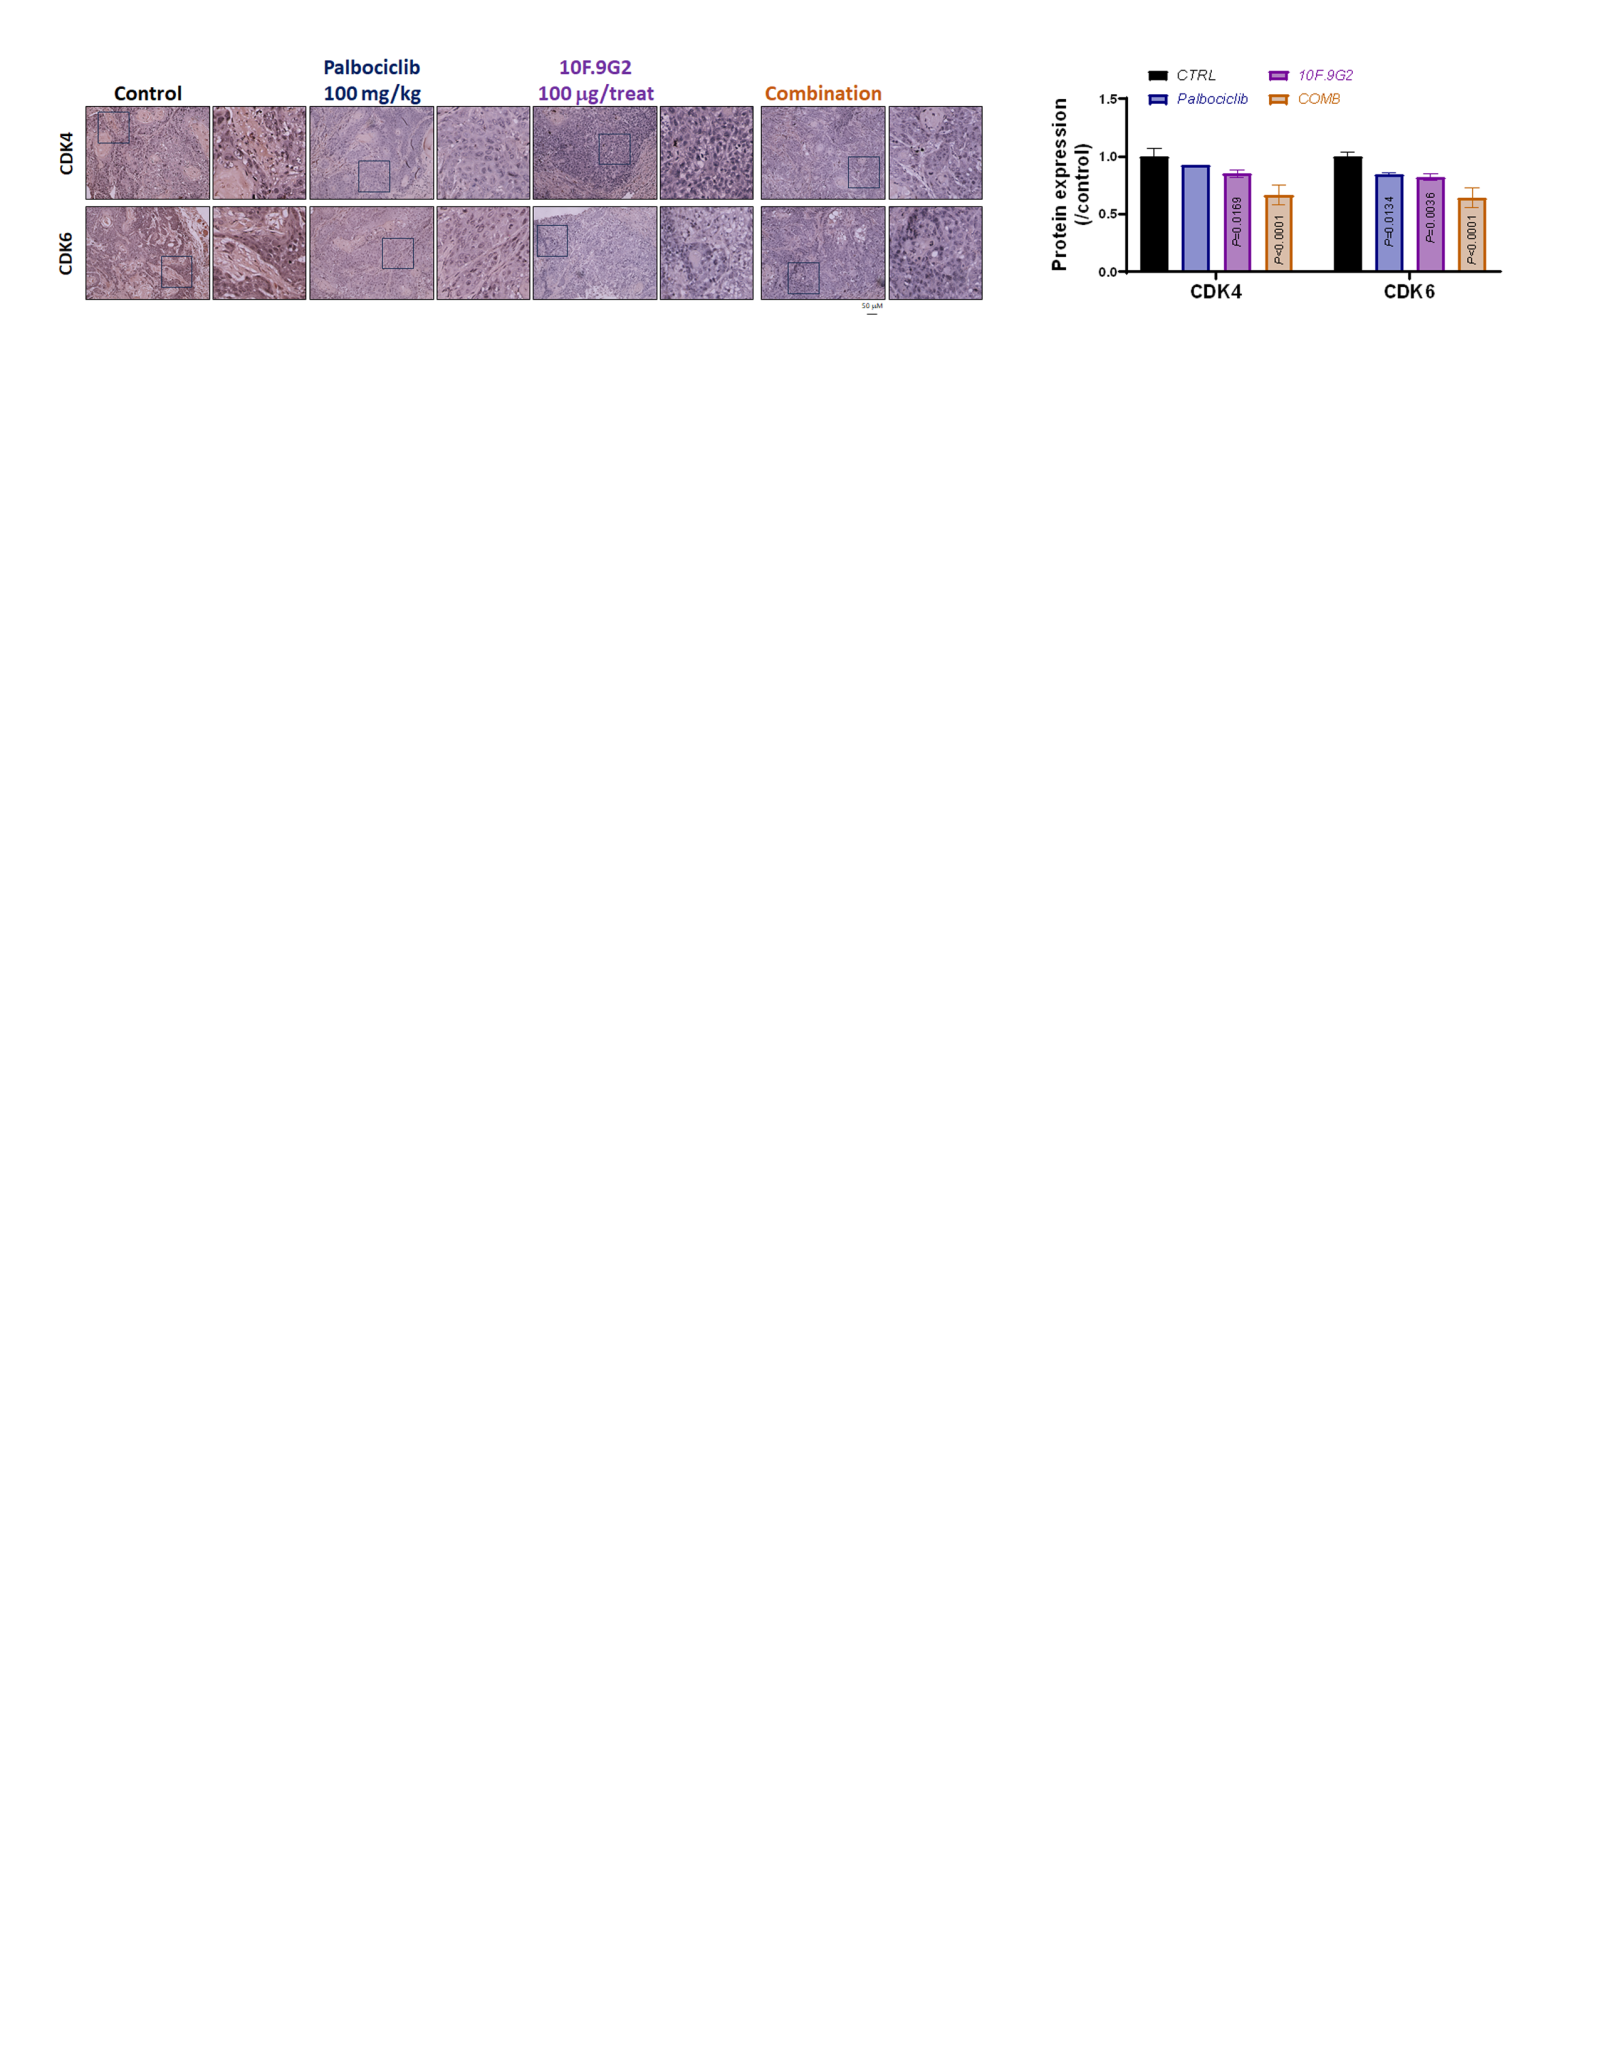
**

**Supplementary Figure 2. CDK4 and CDK6 expression pattern and quantification results validated by IHC staining.**

**
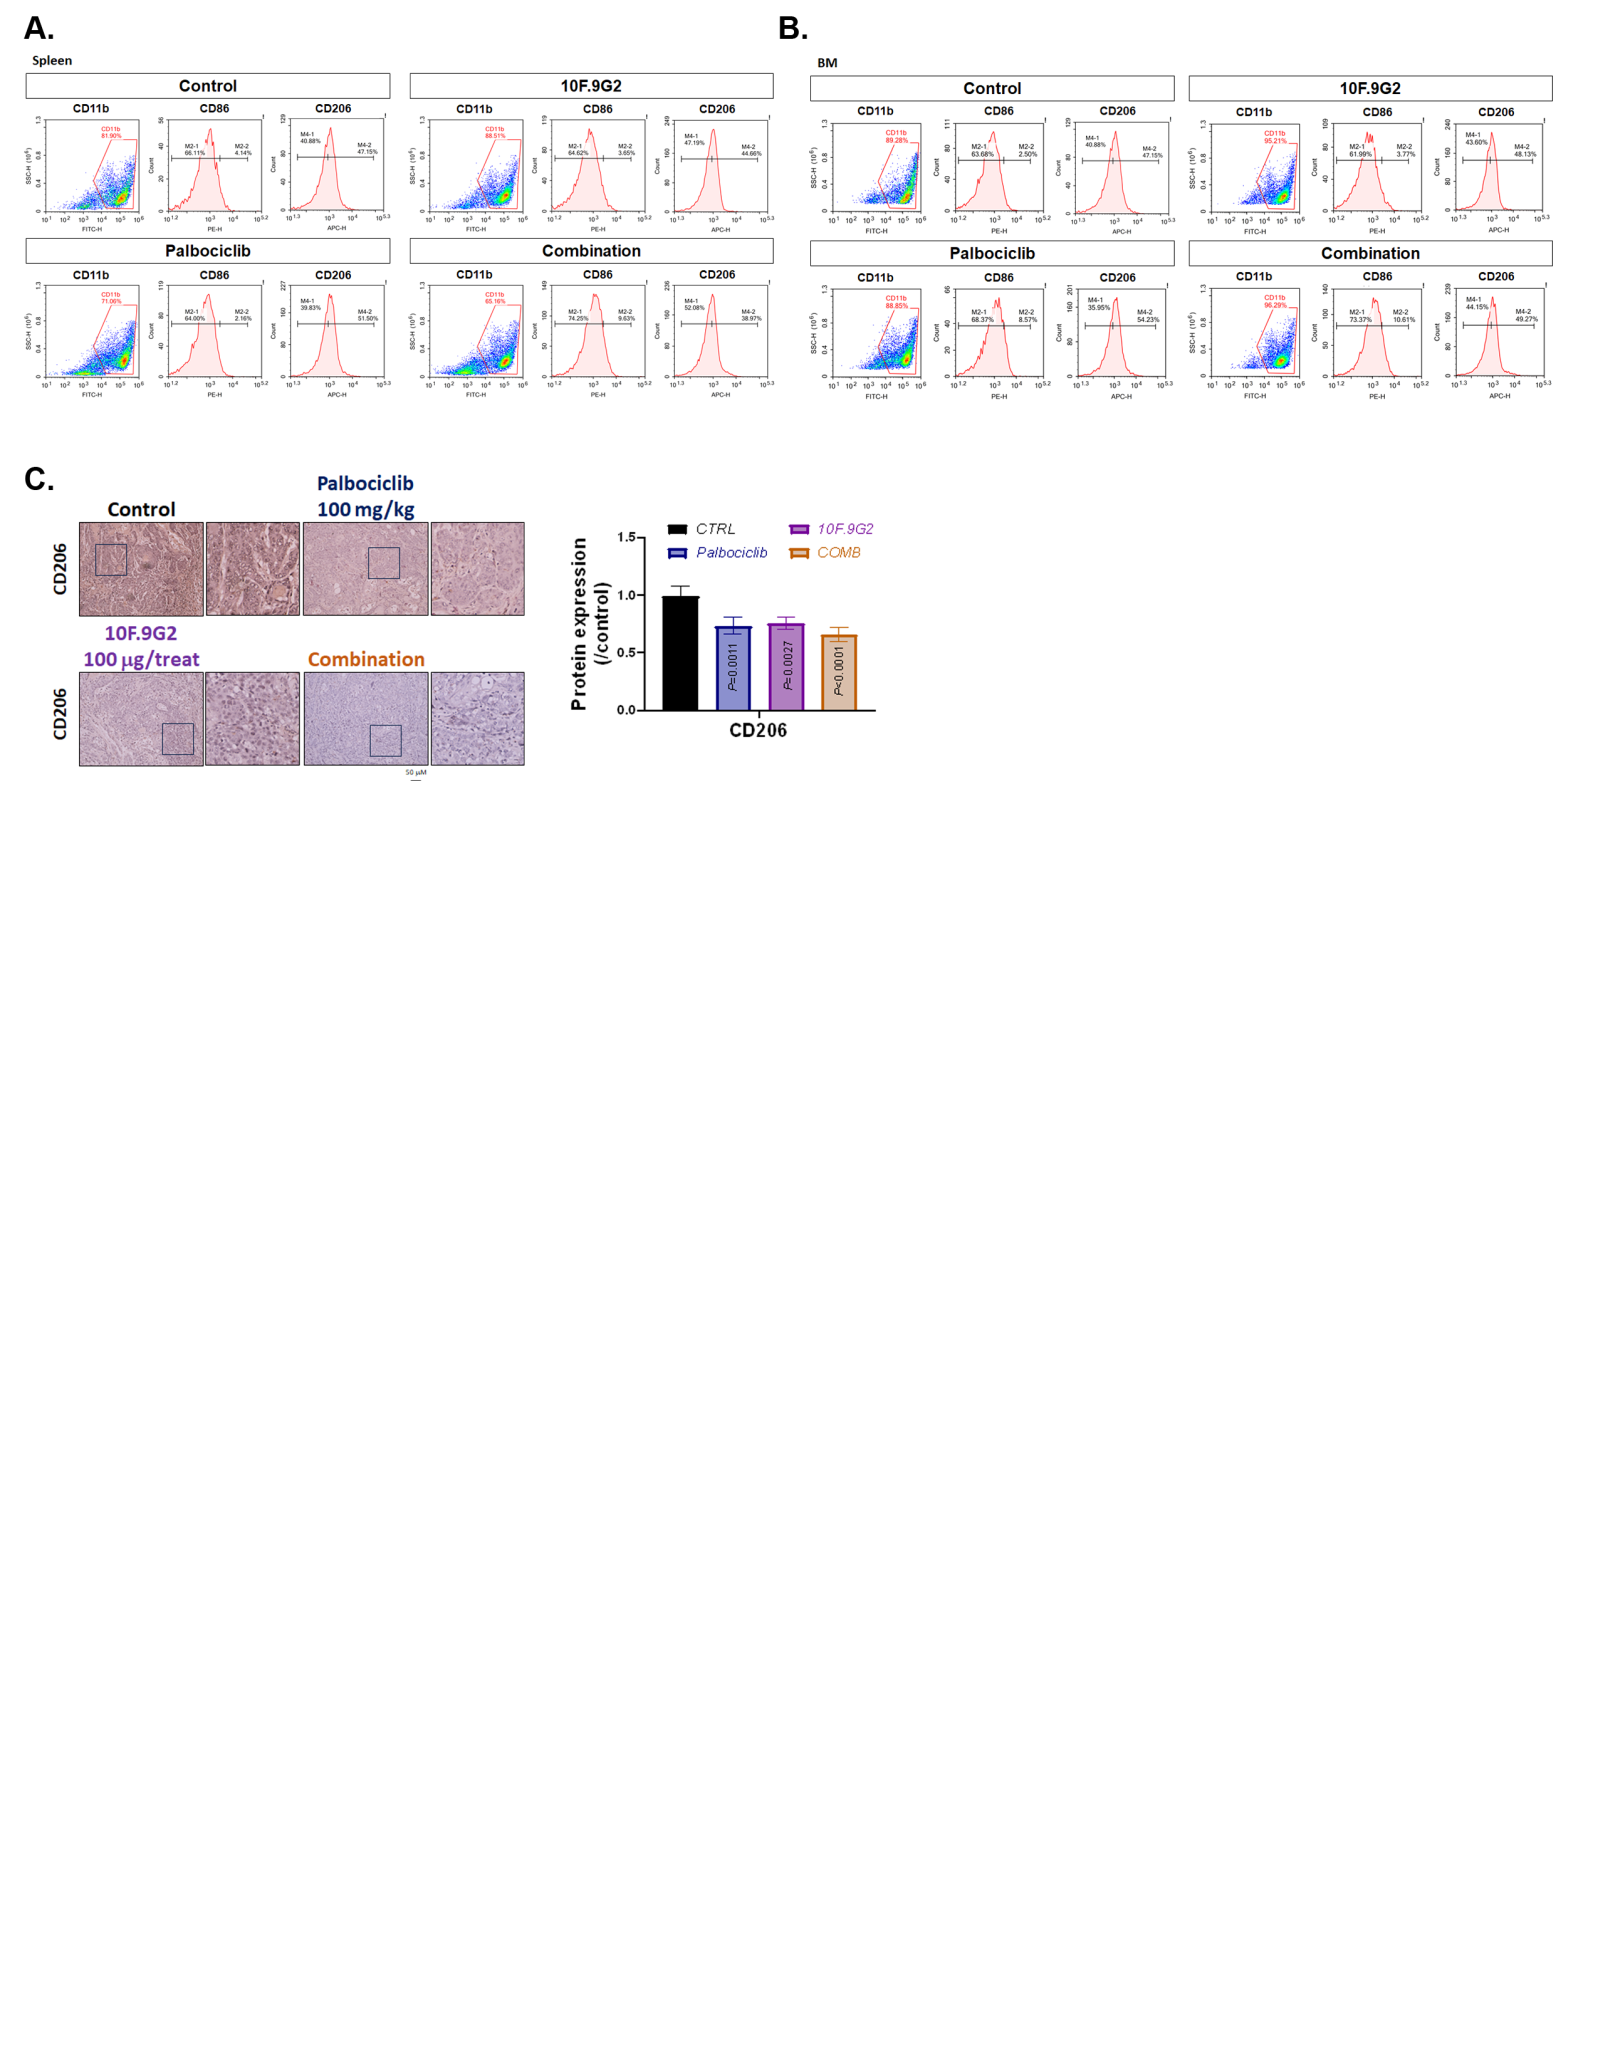
**

**Supplementary Figure 3. M1/M2 macrophages marker’s expression pattern.** (A-B) M1/M2 CD11b, CD86 and CD206 expression pattern in spleen and bone marrow validated by flow cytometry and their quantification data are displayed in main text Figure 5A and Figure 6A. (C) CD206 expression pattern in tumor tissue validated by IHC staining and their quantification data.

**
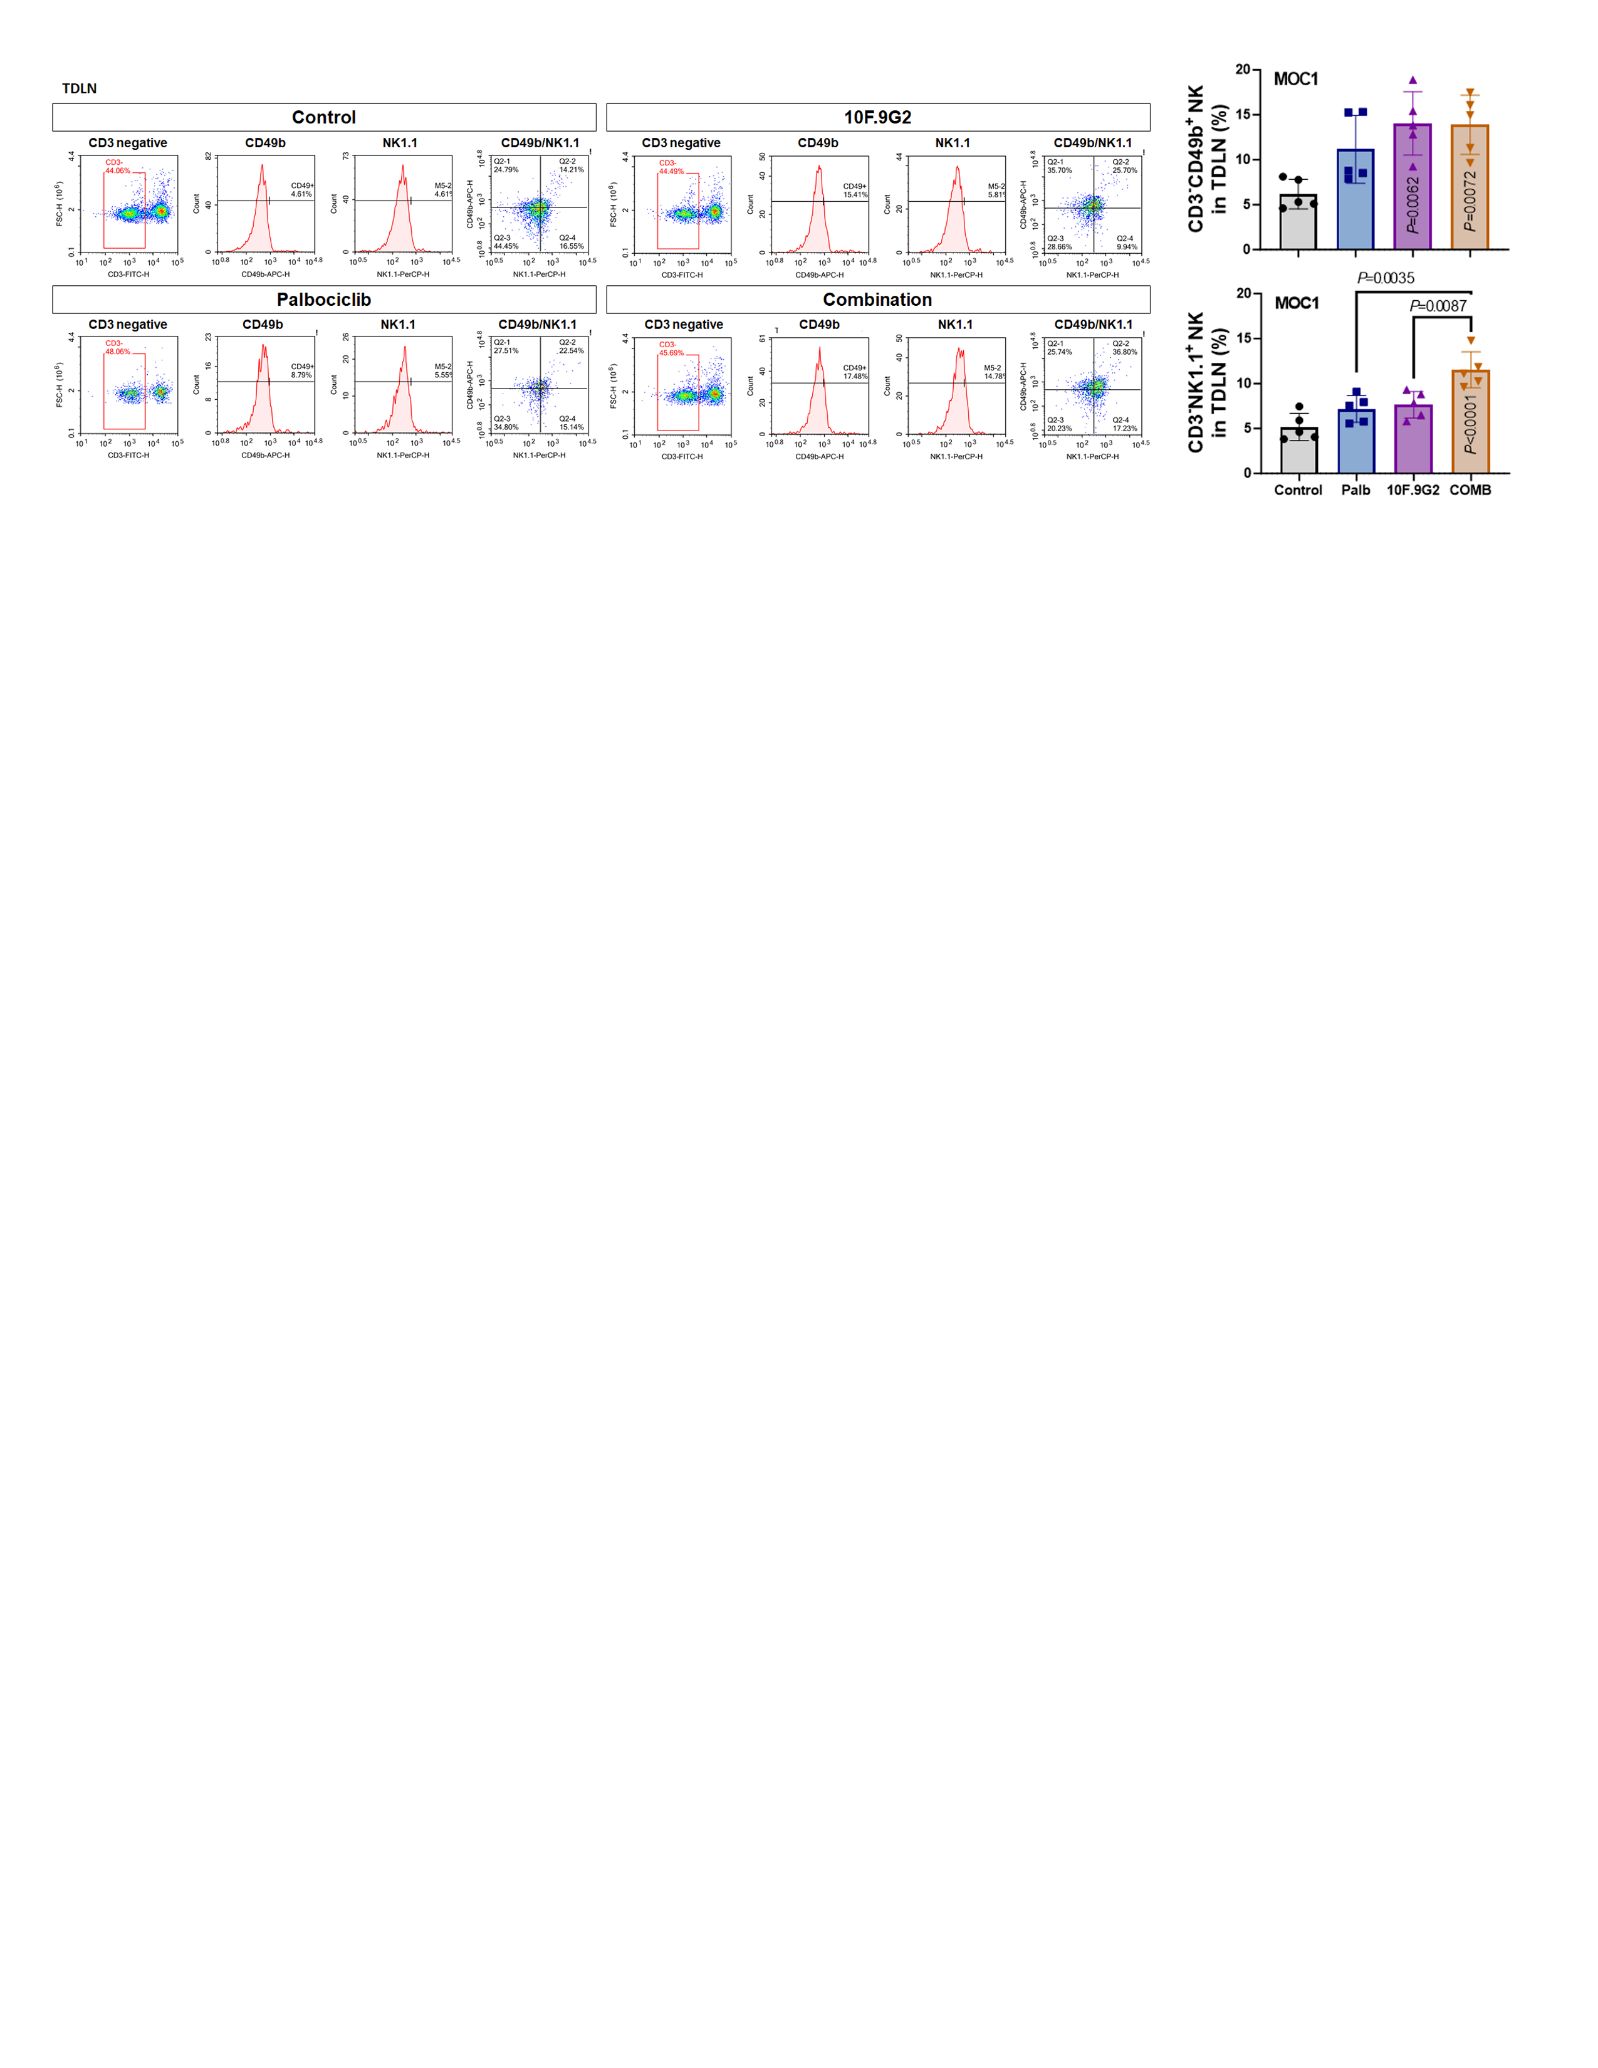
**

**Supplementary Figure 4. NK cells marker’s expression pattern.** CD3, CD49b and NK1.1 expression pattern in TDLN validated by flow cytometry and part of their quantification data are displayed in main text Figure 5B.

**
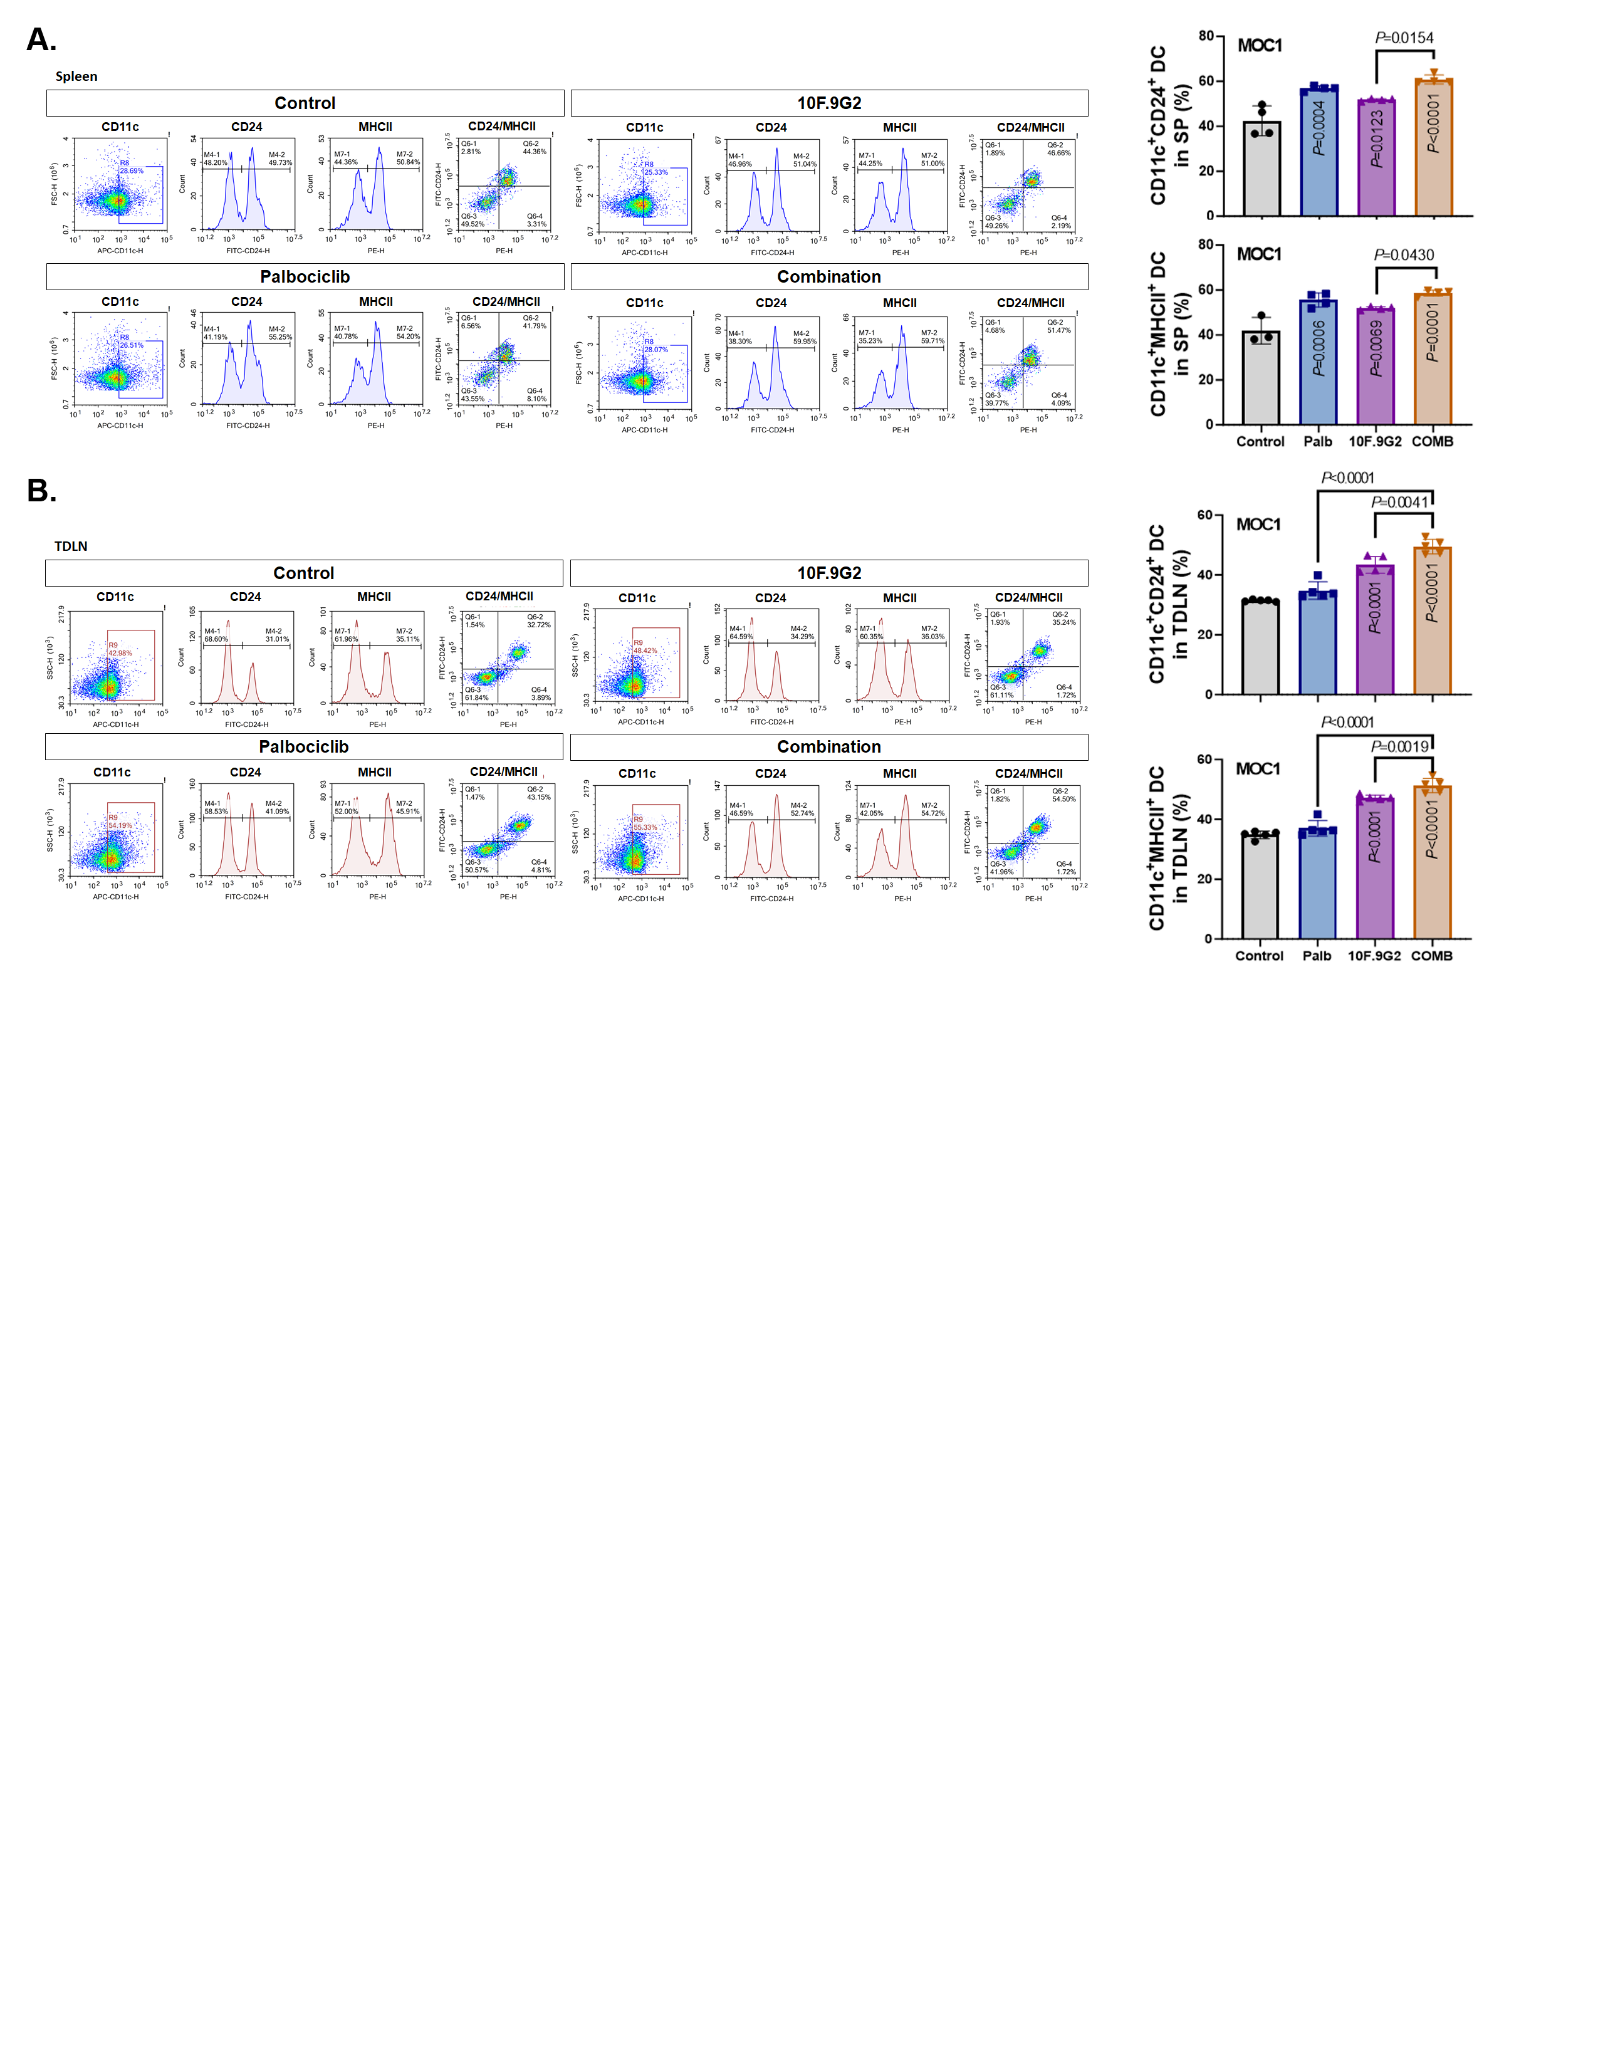
**

**Supplementary Figure 5. DC cells marker’s expression pattern.** (A-B) CD11c, CD24 and MHCII expression pattern in spleen and TDLN validated by flow cytometry and part of their quantification data are displayed in main text Figure 5C.

**
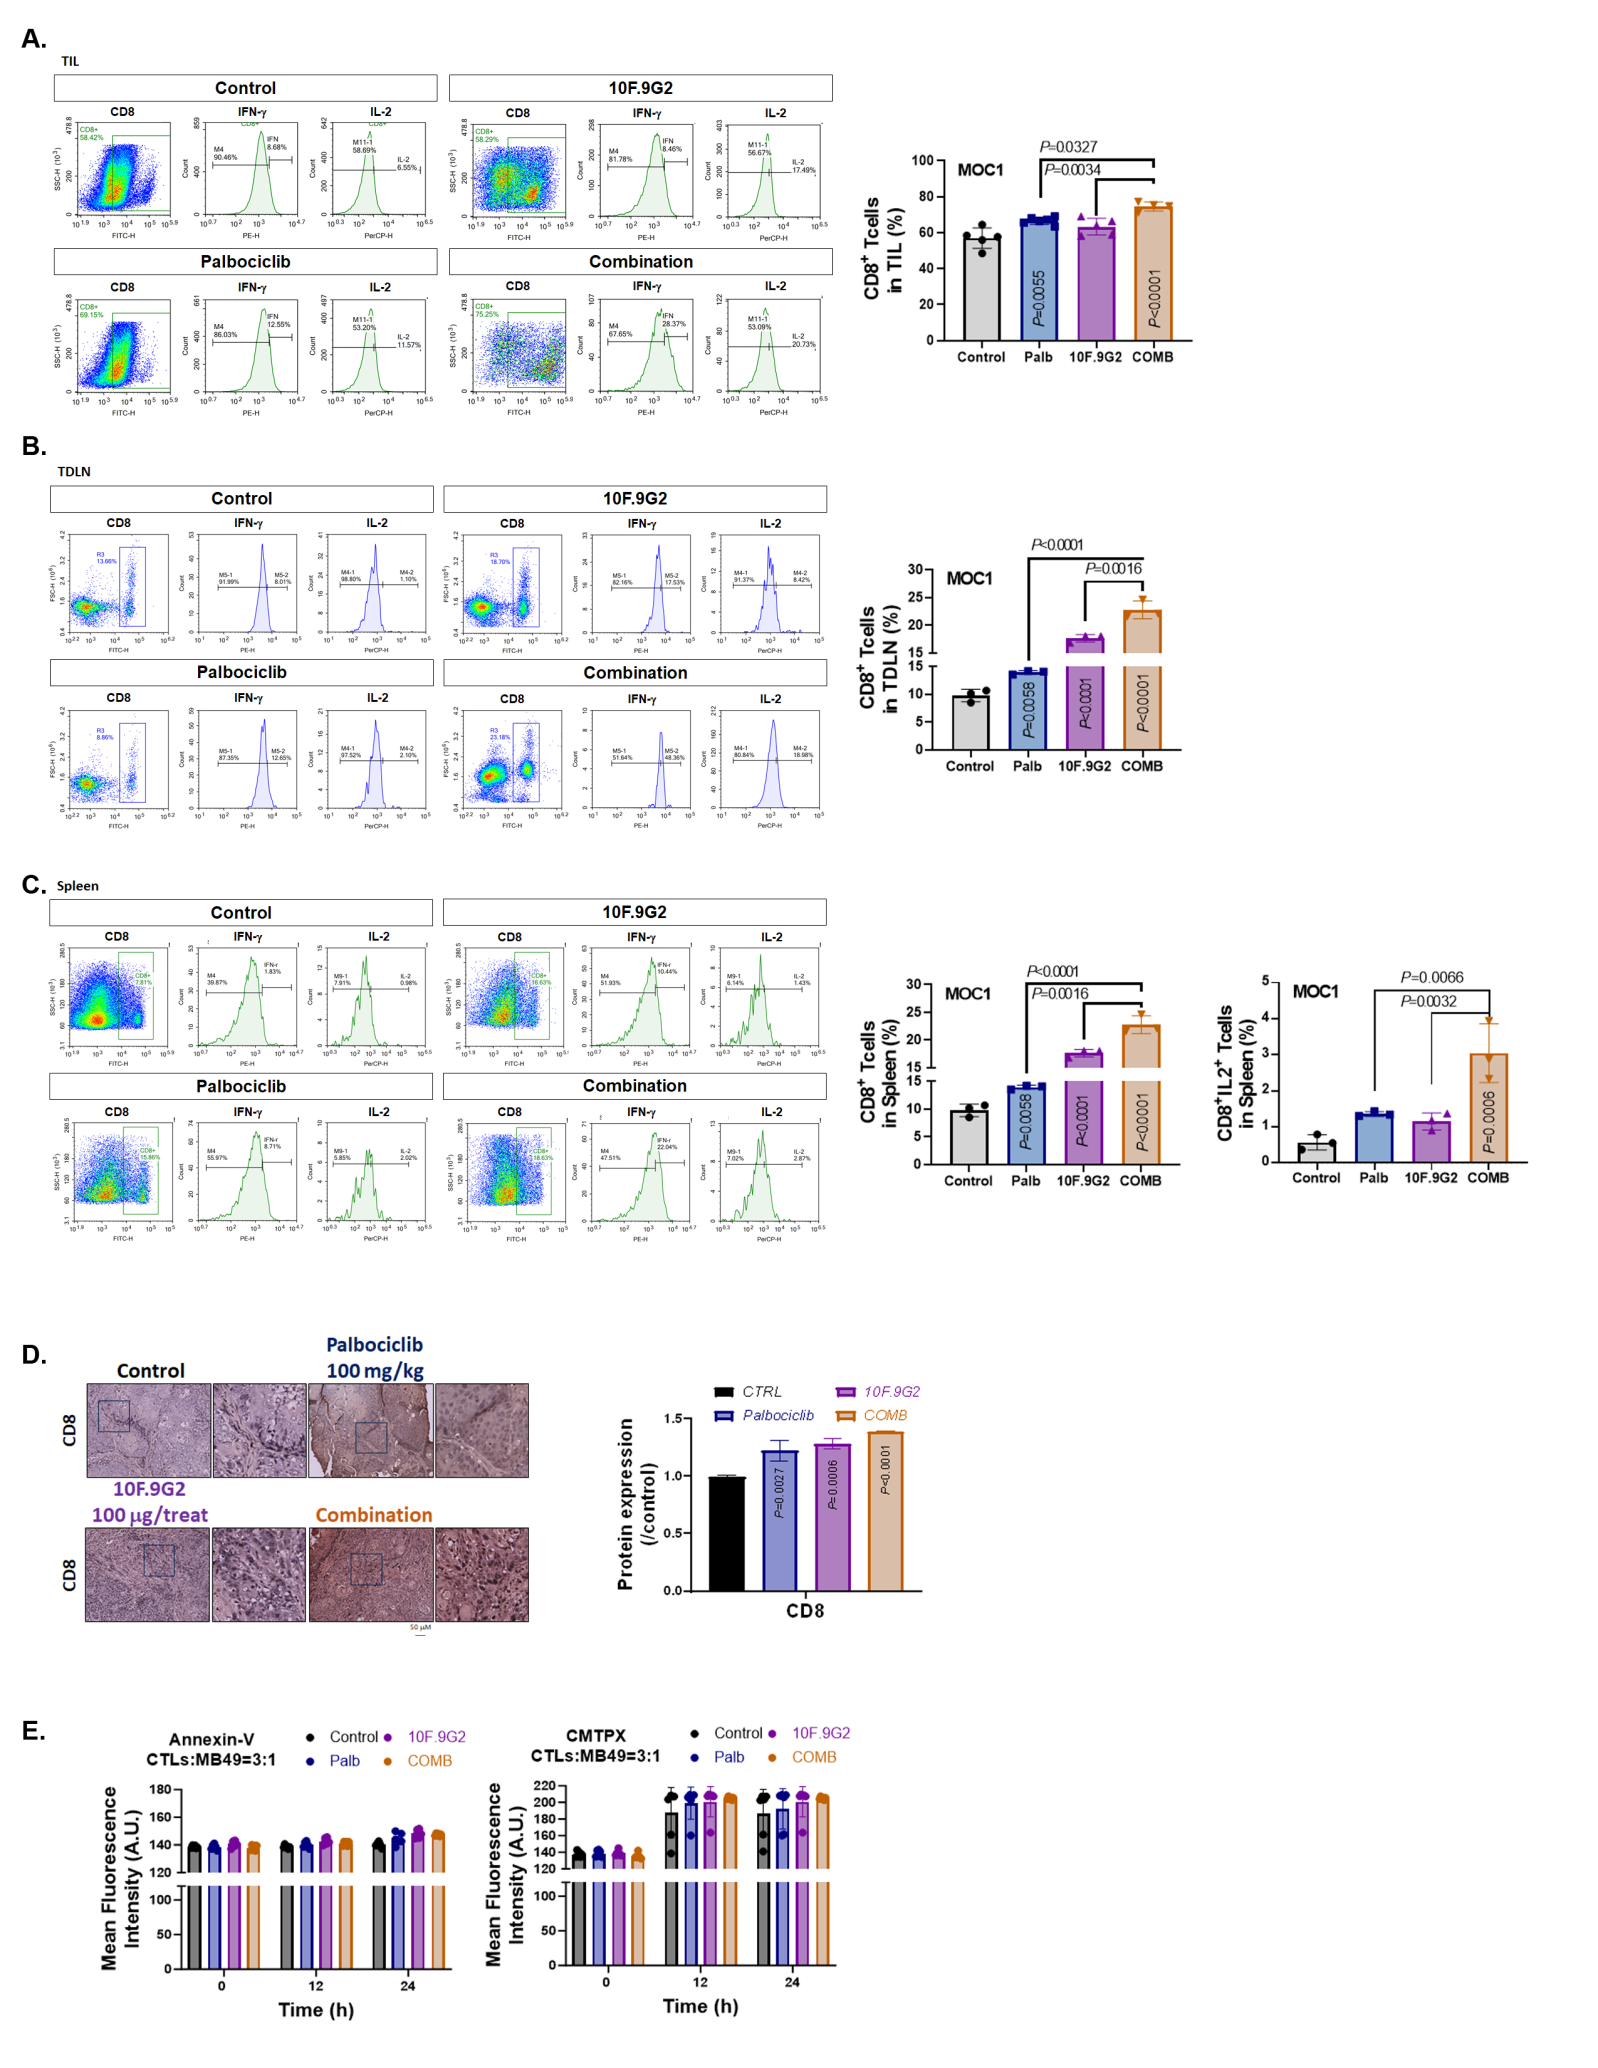
**

**Supplementary Figure 6. Cytotoxicity T cells marker’s expression pattern and toxicity effect.** (A-C) CD8, IFN-g and IL2 expression pattern in TIL, TDLN and spleen validated by flow cytometry and part of their quantification data are displayed in main text Figure 5D-F. (D) CD8 expression pattern in tumor tissue validated by IHC staining and their quantification data. (E) T cell killing effect of non-target control MB49 cells validated by Annexin-V and CMTPX staining.

**
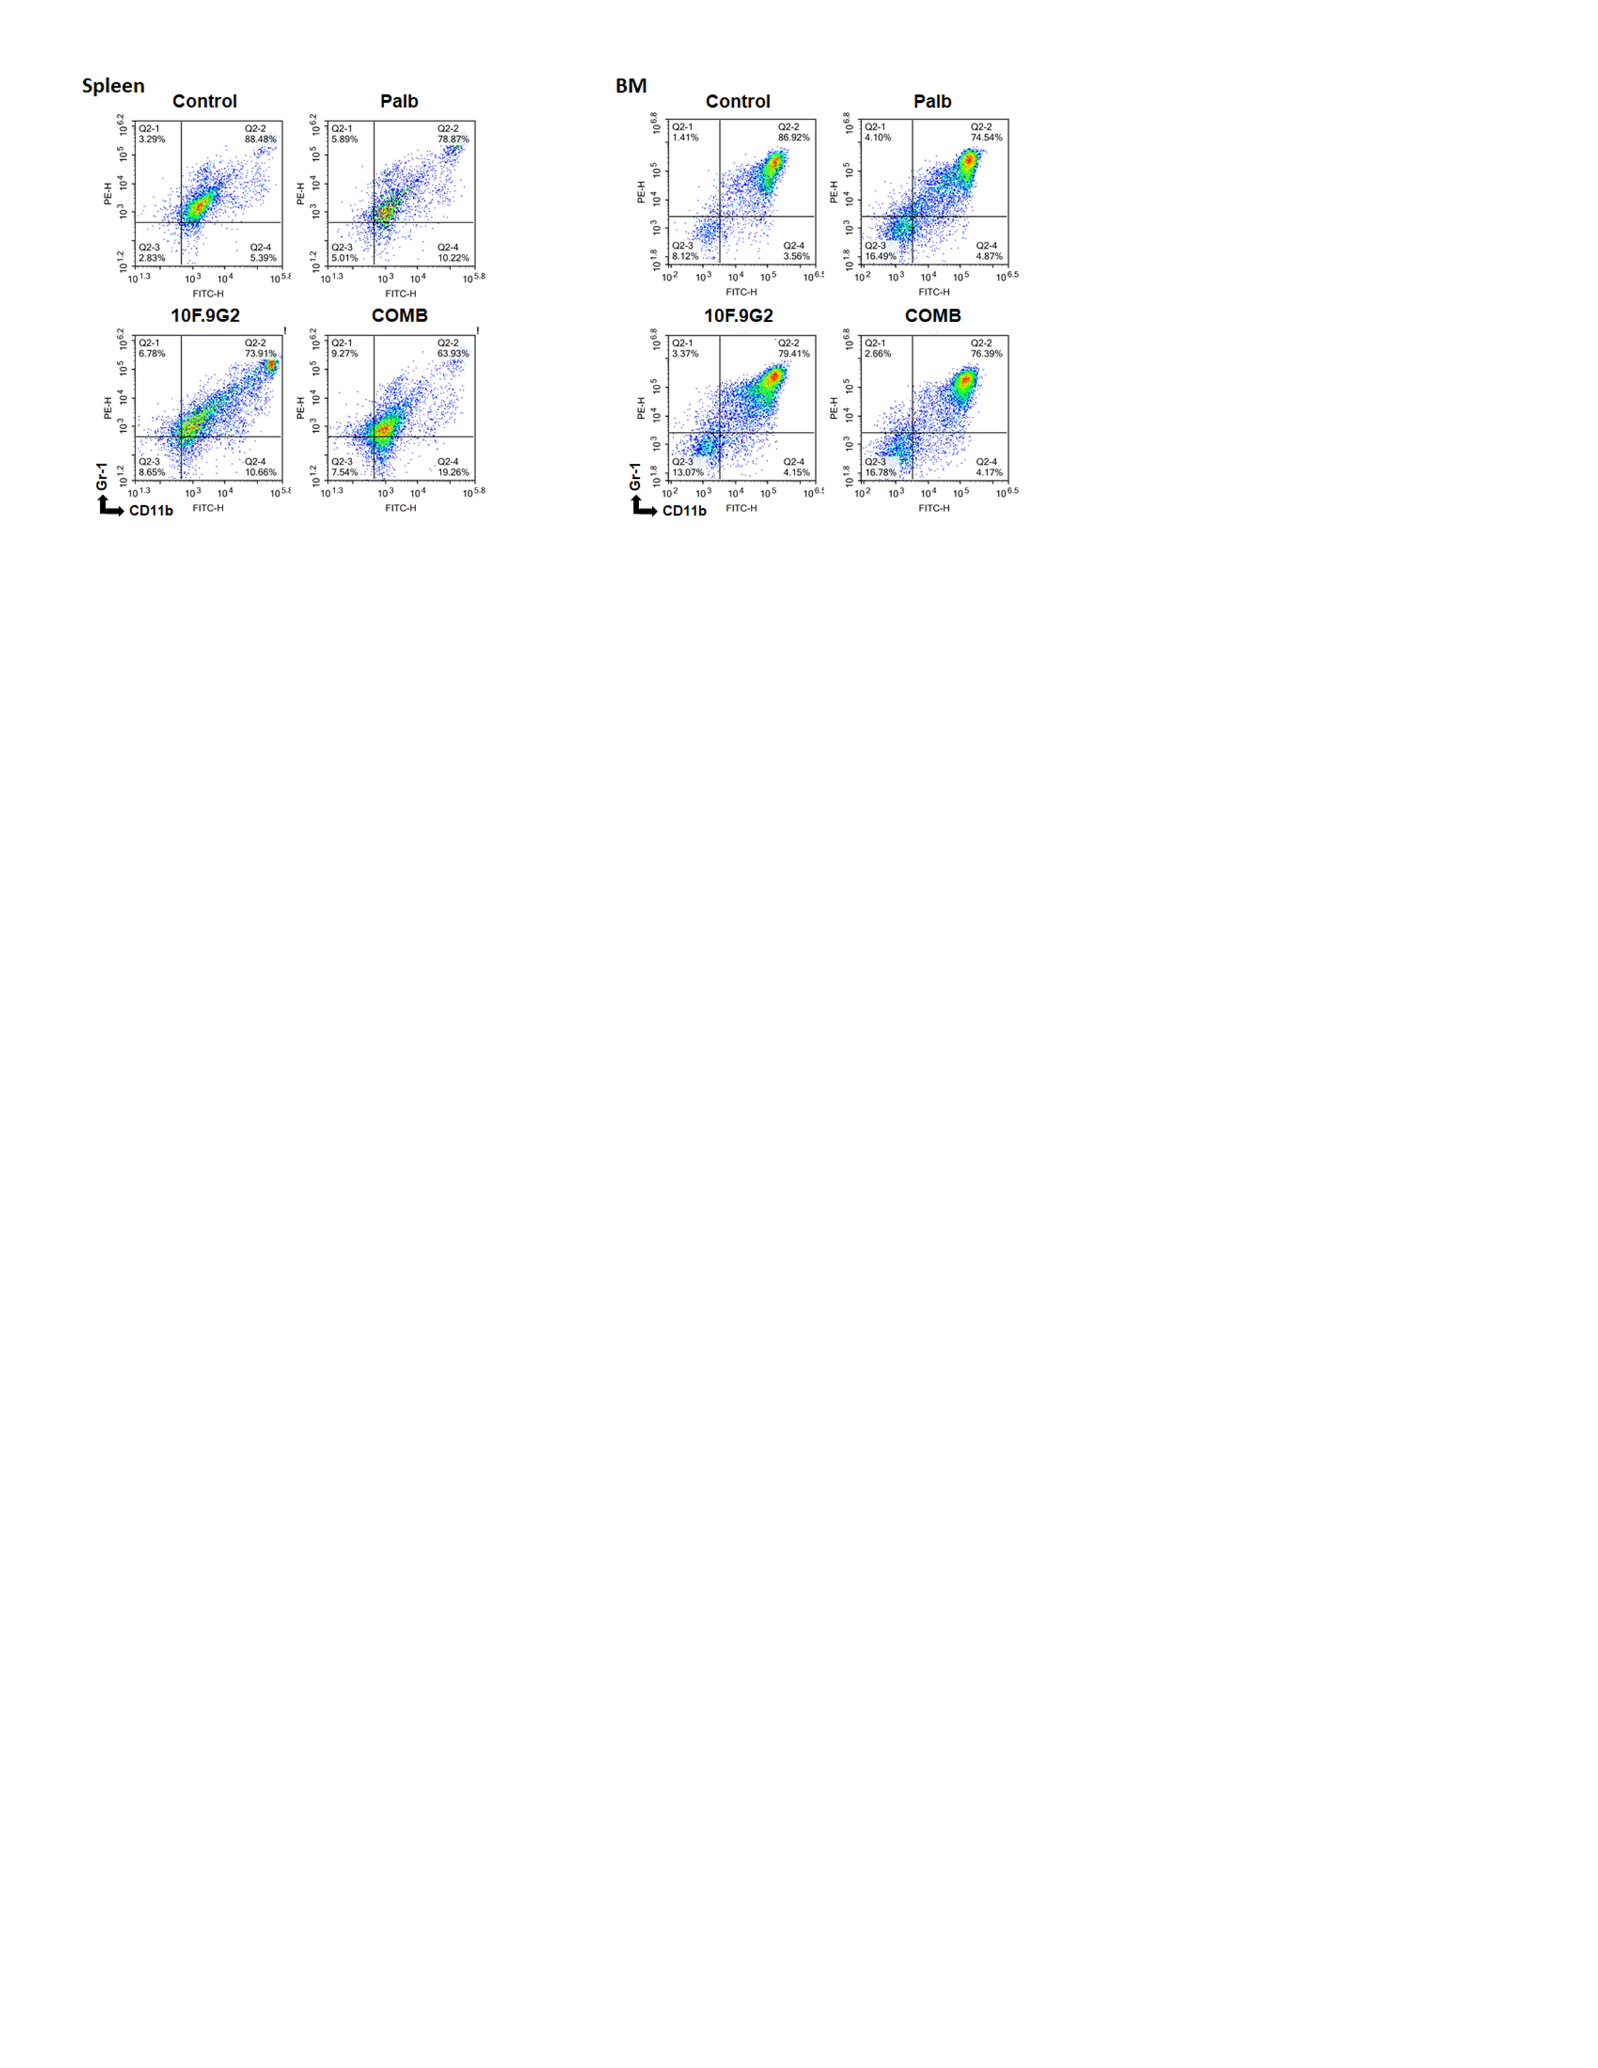
**

**Supplementary Figure 7. MDSCs marker’s expression pattern.** CD11b and Gr-1 expression pattern in spleen and bone marrow validated by flow cytometry and part of their quantification data are displayed in main text Figure 6B.

**
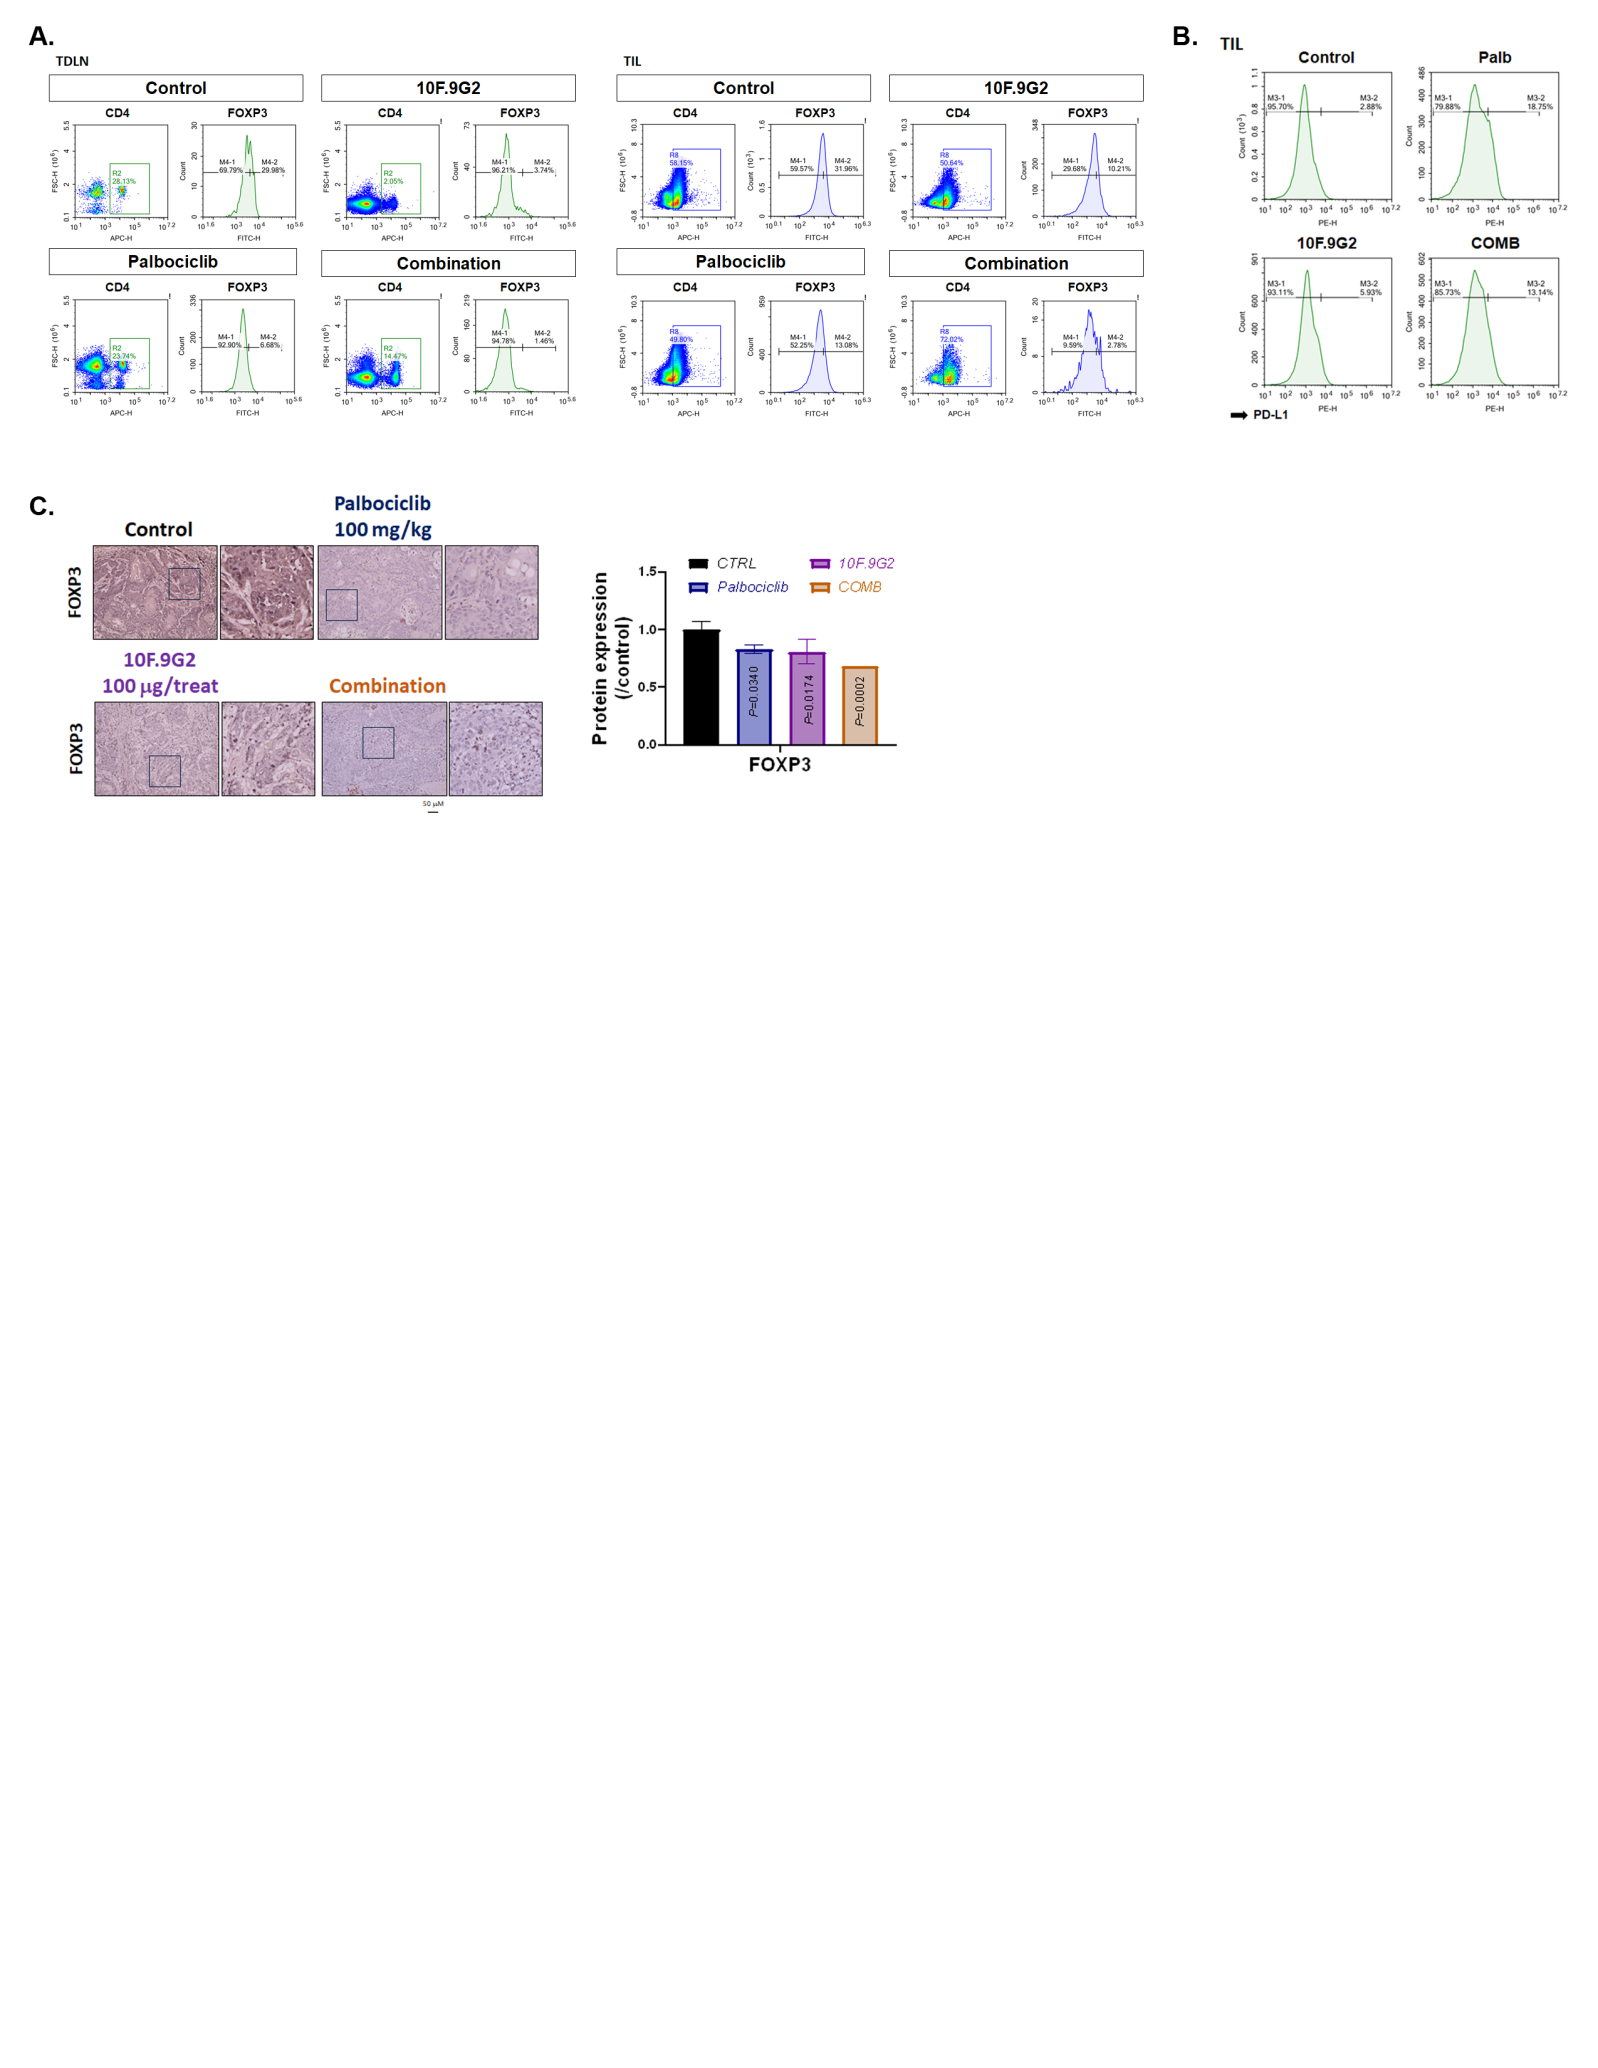
**

**Supplementary Figure 8. Tregs marker’s expression pattern.** (A) CD4 and FOXP3 expression pattern in TDLN and TIL validated by flow cytometry and their quantification data are displayed in main text Figure 6C. (B) CD45 positive PD-L1 expression pattern in TIL validated by flow cytometry and their quantification data are displayed in main text Figure 6D. (C) FOXP3 expression pattern in tumor tissue validated by IHC staining and their quantification data.

**Supplementary Table I**. **Reagents of this work.**

| Reagents | | Company | Cat no. or product no. |
| --- | --- | --- | --- |
| McCOY’s 5A Medium | | Hyclone Laboratories, Logan, UT, USA | SH30200.01 |
| Penicillin-Streptomycin Solution | | Hyclone Laboratories, UT, USA | SV30010 |
| Trypsin EDTA Solution | | Sartorius, Germany | 03-079-1B |
| Fetal Bovine Serum | | Hyclone Laboratories, UT, USA | SH30396.02HI |
| Matrigel | | Corning,NY, USA | 356237 |
| Xylazine (Rompun) | Elanco, Indiana, USA | | Rompun |
| Zoletil 50 | | Virbac, Carros Cedex, France | Zoletil 50 |
| Isoflurane | | Piramal Critical Care, Bethlehem,PA, USA | N01AB06 |
| Magnolol | | ChemFaces, Wuhan, Hubei, China | CAS 528-43-8 |
| DMSO | | Sigma-Aldrich, St.Louis, MO, USA | CAS 67-68-5 |
| Immunoperoxidase Secondary Detection System | | Merck Millipore, Burlington, MA, USA | DAB500 |

**Supplementary Table II. Primary antibodies used in this study for flow cytometry.**

| Antibodies | Company | Product no. |
| --- | --- | --- |
| CD4 | BD Biosciences | 553051 |
| CD8 | BD Biosciences | 553030 |
| CD11b | BD Biosciences | 553310 |
| CD11c | BD Biosciences | 550261 |
| CD25 | BD Biosciences | 553866 |
| CD83 | BD Biosciences | 742263 |
| CD86 | BD Biosciences | 553692 |
| CD206 | BD Biosciences | 565250 |
| FOXP3 | BD Biosciences | 560403 |
| Ly-6G/Ly-6C | BD Biosciences | 553128 |
| IFN- | BD Biosciences | 554412 |
| I-A/I-E | BD Biosciences | 557000 |
| IL-2 | BD Biosciences | 554429 |

**Supplementary Table III**. **Primary antibodies used for immunohistochemistry on MOC1 tumor tissue.**

| Antibodies | Company | Product no. |
| --- | --- | --- |
| Cleaved-Caspase-3 (Asp175) | Cell Signaling Technology, Danvers, MA, USA | #9661 |
| Cleaved Caspase-8(Asp391)(18C8) | Cell Signaling Technology, MA, USA | #9496 |
| Cleaved Caspase-9(Asp315) | Cell Signaling Technology, MA, USA | #9505 |
| CDK4 | Cell Signaling Technology, MA, USA | #12790 |
| CDK6 | Cell Signaling Technology, MA, USA | #3136 |
| CD8 | Cell Signaling Technology, MA, USA | #98941S |
| PDL-1 | Cell Signaling Technology, MA, USA | #13684 |
| SPOP | Proteintech, Rosemont,USA | 16750-1-AP |
| IDO-1 | Cell Signaling Technology, MA, USA | #86630 |
| CD206 (Mannose receptor) | GeneTex, Irvine,California | GTX42264 |
| FOXP3 | Cell Signaling Technology, MA, USA | #12653 |
| CXCL12 (SDF-1) | Abcam, Cambridge, UK | Ab9797 |
| CXCR4 | Proteintech, Rosemont,USA | 11073-2-AP |
| VEGFA | Abcam, Cambridge, UK | ab51745 |

**References**

1 Chen, K. P. *et al.* miR-124 Targets EGFR and Attenuates Growth and Invasion in Bladder Cancer Cells. *In Vivo* **39**, 3216-3225, doi:10.21873/invivo.14121 (2025).

2 Chin, Y. C. *et al.* Galactosylated iron oxide nanoplatforms for targeted imaging and ferroptosis-enhanced glioblastoma therapy via immune modulation. *Mater Horiz* **12**, 9697-9714, doi:10.1039/d5mh01108f (2025).

3 Liu, Y. C., Fang, C. J., Hsu, L. C., Hsu, F. T. & Hu, M. H. Imipramine Inhibits Osteosarcoma Invasion via Src Inactivation and Caspase-Dependent Apoptosis. *J Cell Mol Med* **29**, e70761, doi:10.1111/jcmm.70761 (2025).

4 Yueh, P. F. *et al.* A multifunctional PEGylated liposomal-encapsulated sunitinib enhancing autophagy, immunomodulation, and safety in renal cell carcinoma. *J Nanobiotechnology* **22**, 459, doi:10.1186/s12951-024-02664-5 (2024).
